# Supplementary material for: Tauroursodeoxycholic acid reduces glial cell activation in an animal model of acute neuroinflammation
Source: PubMed Central journal article supplement (PMC4000131; doi:10.1186/1742-2094-11-50), 2014-03-19
Supplement: 1742-2094-11-50-S1.pdf [file 1742-2094-11-50-S1.pdf]

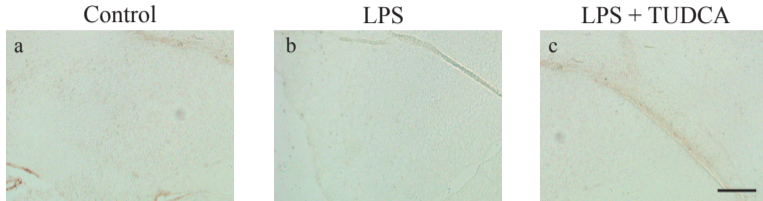

**Additional file A2. Nonspecific binding of the anti-mouse secondary antibody in mice hippocampus.** The secondary anti-mouse biotinylated antibody does not have any nonspecific staining in mice hippocampus in acute inflammatory injury. Section treatments are as follows: Control (a) , icv LPS (b), icv LPS + ip TUDCA (c). Scale bar 100  $\mu\text{m}$ .
