# Supplementary material for: Tauroursodeoxycholic acid reduces glial cell activation in an animal model of acute neuroinflammation
Source: PubMed Central journal article supplement (PMC4000131; doi:10.1186/1742-2094-11-50), 2014-03-19
Supplement: 1742-2094-11-50-S2.pdf [file 1742-2094-11-50-S2.pdf]

## Astrocytes

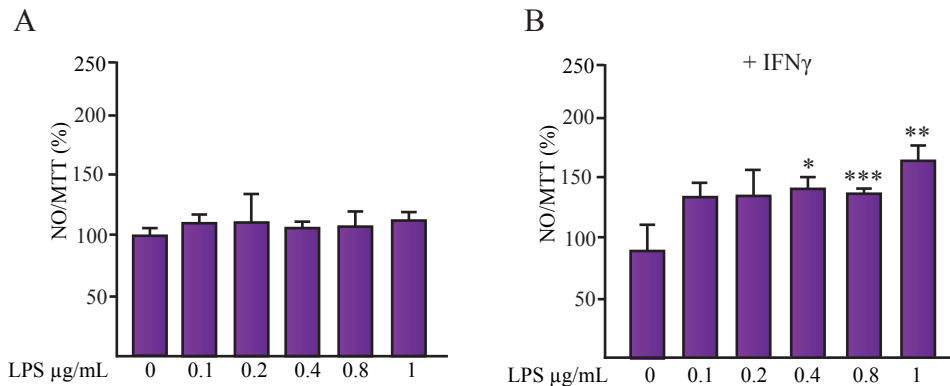

## Microglia

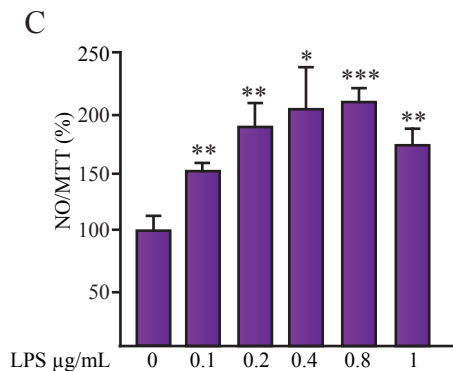

### Additional file A1. Development of an in vitro proinflammatory response in microglia and astrocytes.

Cell treatment with increasing concentrations of LPS or LPS plus IFN $\gamma$  for 24h showed that LPS alone induced nitrite (NO) secretion in microglial cells; however, astrocytes also required the addition of IFN $\gamma$  (20ng/mL) to develop this response in vitro. Based on these results, we decided that the optimal LPS concentration to treat microglial cells was 200ng/mL, because it induced an almost two fold increase in the secretion of NO. We also decided to treat astrocytes with 1 $\mu\text{g/mL}$  LPS + 20ng/mL IFN $\gamma$ , for the same reason. We discarded lower concentrations that were also inducing NO secretion in order to guarantee a proper proinflammatory response and be able to study the effect of a bile acid (TUDCA) in this response. The bar graphs represent the mean of the percentage related to control  $\pm$  SD of 4 experiments (for both cell types) in triplicates.
